# Supplementary material for: Bistable Expression of Virulence Genes in Salmonella Leads to the Formation of an Antibiotic-Tolerant Subpopulation
Source: PubMed Central journal article supplement (PMC4138020; doi:10.1371/journal.pbio.1001928), 2014-08-19
Supplement: pbio.1001928.s017.pdf [file pbio.1001928.s017.pdf]

## QUANTIFYING VARIATION IN $IC_x$ VALUES

A dose-response dataset is a collection of dosages  $d_i$  for  $i = 0, \dots, N$  that satisfy  $0 = d_0 < d_1 < \dots < d_N$ . Population density data at some defined time  $T$ , taken here to be  $18h$ , is held in an  $N \times M$  matrix  $\mathcal{D} := (D_{ij})$ , representing data taken from a microtitre plate-reading device. These are determined empirically for  $j = 1, \dots, M$ ,  $M$  being the number of replicates of each bacterial culture at each dose. An inhibition coefficient, or  $IC_x$ , is a value of the dose that reduces population density by  $x\%$  relative to drug-free growth. Other growth measures could be used, for example, an estimate of exponential growth rate.

To approximate  $IC_x$  the following is done. First, the mean density of the zero-drug control is determined,  $\overline{D_0} := \frac{1}{M} \sum_{j=1}^M D_{0j}$ , one then chooses a putative model  $F(\cdot)$  of the data. This must be a function such that the approximation  $D_{ij} \approx F(d_j)$  is possible with respect to some metric (and below we require that the regression coefficient  $R^2 > 0.99$  for this). A standard choice for  $F$  is a Hill function, whereby

$$F(d) = \Delta \frac{K^n}{d^n + K^n}.$$

This has many of the properties desired by a dose-response in the sense that it is a monotone decreasing function that satisfies  $F(d) > 0$ ,  $F(0) = \Delta > 0$  and  $\lim_{d \rightarrow \infty} F(d) = 0$ . Other choices are possible, but a Hill function approach is common. Then, given that  $x$  is expressed as a percentage, solve for  $d$  in  $F(d) = (x\overline{D_0})/100$ , it follows that  $IC_x \approx d$ . In other words,

$$F(IC_x) = (x\overline{D_0})/100.$$

When this solution exists, it is unique because  $F$  is a decreasing function.

Given  $\alpha$ , using nonlinear regression we then estimate  $100 \cdot (1 - \alpha)\%$ -confidence intervals that estimate upper and lower envelopes,  $F^-(d)$  and  $F^+(d)$  of the predicted dose-response at each dose. In general, these are non-monotone functions that satisfy  $F^-(d) < F(d) < F^+(d)$ . An estimate of the confidence interval of  $IC_x$  is then given by the interval  $(d_-, d_+)$  where

$$(F^-)^{-1}(d_-) = (x\overline{D_0})/100 = (F^+)^{-1}(d_+).$$

This procedure was implemented in Matlab using the `NonLinearModel` class from the Statistics Toolbox, and the results are presented in Figure S5.
